# Supplementary material for: Magnetic C–C@Fe3O4 double-shelled hollow microspheres via aerosol-based Fe3O4@C-SiO2 core–shell particles
Source: Royal Society of Chemistry journal article supplement (doi:10.1039/c4cc09409c), 2015-01-01
Supplement: c4cc09409c1.pdf [file c4cc09409c1.pdf]

**Supporting information**

**Magnetic C-C@Fe<sub>3</sub>O<sub>4</sub> double-shelled hollow microspheres *via* aerosol-based  
Fe<sub>3</sub>O<sub>4</sub>@C-SiO<sub>2</sub> core-shell particles**

Yangzhi Zhu, Xiangcun Li\*, Gaohong He, Xinhong Qi

State Key Laboratory of Fine Chemicals, Chemical Engineering Department

Dalian University of Technology

Linggong Road 2#, Dalian 116024, China

E-mail: [lixiangcun@dlut.edu.cn](mailto:lixiangcun@dlut.edu.cn)

## Experimental section

### *Chemicals*

Tetraethyl orthosilicate (TEOS),  $\text{FeCl}_3 \cdot 6\text{H}_2\text{O}$ , cetyltrimethylammonium bromide (CTAB) were purchased from Sigma-Aldrich.  $\text{K}_2\text{PtCl}_6$ , 2,4-dihydroxybenzoic acid (RF-COOH, 98%) were obtained from Aladdin (Shanghai, China). Resorcinol, formaldehyde, concentrated ammonia solution (~28%), sucrose, absolute ethanol, and all of the other chemical reagents were of analytical grade and used without further purification (Damao Chemical Company, Tianjin, China). Deionized water was used for all experiments.

### *Synthesis of $\text{Fe}_3\text{O}_4$ and $\text{Fe}_3\text{O}_4@\text{C-SiO}_2$ core-shell particles*

$\text{Fe}_3\text{O}_4$  nanoparticles were prepared according to our previous work.<sup>1, 2</sup> A rapid aerosol approach was used to prepare  $\text{Fe}_3\text{O}_4@\text{C-SiO}_2$  core-shell particles. The aerosol precursor solution was prepared by mixing 1.0g  $\text{FeCl}_3 \cdot 6\text{H}_2\text{O}$  and 1.1g CTAB in 15ml ethanol solution, followed by sonication for a while to form a clear solution. Then 120mg  $\text{Fe}_3\text{O}_4$  nanoparticles were added and sonicated for 10min to get a homogeneous dispersion. Finally, 2.0 ml of a 0.1M HCl solution and the dissolution of 1 g of sucrose, 4.5ml TEOS were added to the above dispersion, respectively. The mixture solution was sonicated for 20min to get a brown aerosol solution. The aerosol solution was aerosolized using a commercial atomizer (model HD-130, HOLDER) to form aerosol droplets, which passed through a quartz tube with a heating zone. The temperature of the heating zone was held at 200 °C, and the pressure of carrying gas  $\text{N}_2$  was adjusted to yield a droplet residence time of about 20s through the furnace. The aerosol particles were collected by a microfiltration membrane which was maintained at 100°C. The as-synthesized particles were calcined in  $\text{N}_2$  at 500°C for 3 h to obtain  $\text{Fe}_3\text{O}_4@\text{C-SiO}_2$  aerosol core-shell particles.

***Synthesis of  $\text{Fe}_3\text{O}_4@\text{C-SiO}_2@\text{RF-COOH}$  core-shell particles and  $\text{C-C}@\text{Fe}_3\text{O}_4$  double-shelled porous hollow particles***

The as-prepared  $\text{Fe}_3\text{O}_4@\text{C-SiO}_2$  aerosol core-shell particles were homogenously dispersed in the mixed solution of deionized water and ethanol by ultrasonication, followed by the addition of CTAB, and stirred at room temperature. The mixed solution was sonicated for 15min to form a uniform dispersion. The surface zeta potential of the  $\text{Fe}_3\text{O}_4@\text{C-SiO}_2$  particles was tested to be -22.8 mV in the mixed solution. Accordingly, the particles can homogenously disperse in the solution after the sonication process and addition of CTAB molecules. 2,4-dihydroxybenzoic acid and formaldehyde were added to the dispersion with continuous stirring for 10min. After the addition of ammonia solution, the weight ratio of  $(\text{Fe}_3\text{O}_4@\text{C-SiO}_2)$ -CTAB-(2,4-dihydroxybenzoic acid)-formaldehyde- $\text{H}_2\text{O}$ -ethanol-ammonia solution was 1 : 1.5 : 0.64 : 1.0 : 600 : 200 : 3.66. The final solution was stirred at 25°C for 20h, and the  $\text{Fe}_3\text{O}_4@\text{C-SiO}_2@\text{RF-COOH}$  core-shell particles were collected by centrifugation. The products were washed with water and ethanol several times and then dried at 60°C in air overnight. The dried particles were then carbonized at 800°C for 4h in  $\text{N}_2$  with a heating rate of 2°C/min. The calcined particles were etched in 2.0M NaOH solution for 24h to remove silica and obtain  $\text{C-C}@\text{Fe}_3\text{O}_4$  particles.

***Synthesis of  $\text{C-C}@\text{Fe}_3\text{O}_4\text{-Pt}$  particles***

In a typical deposition process, 1.0mL 0.024M  $\text{K}_2\text{PtCl}_6$  aqueous solution was added to a 100mL 1:1 (volume/volume) water and ethanol mixed solution containing  $\text{C-C}@\text{Fe}_3\text{O}_4$  particles (20mg). The obtained mixture was subjected to 100°C for 60min under mechanically stirring, and then allowed to cool to room temperature. The obtained black products  $\text{C-C}@\text{Fe}_3\text{O}_4\text{-Pt}$  were washed with ethanol and water

respectively, and then dried at 60°C.

#### ***Catalytic reduction of 4-nitrophenol using C-C@Fe<sub>3</sub>O<sub>4</sub>-Pt particle***

The reduction of 4-nitrophenol was carried out in a quartz cuvette. First, 0.4 mL of aqueous 4-nitrophenol solution (1mM) was mixed with 2mL of fresh NaBH<sub>4</sub> solution (0.02M). Subsequently, 2mL of C-C@Fe<sub>3</sub>O<sub>4</sub>-Pt dispersion (0.25mg mL<sup>-1</sup>) was added to the above solution. Then, the final mixture solution was quickly subjected to UV-vis measurements under different reaction times. The catalyst was recycled by an external magnetic field and washed with deionized water for reuse.

#### ***Measurements and characterizations***

The microstructure of the magnetic composite microspheres was taken using a Hitachi-4800 field emission scanning electron microscope (FE-SEM) and a Tecnai-20 transmission electron microscope (TEM). X-ray diffraction (XRD) patterns were obtained with a D/MAX-2400 diffractometer (Cu K $\alpha$  radiation, 120 0.154 nm). Magnetic measurements of samples were performed on a Quantum Design SQUID (MPMS XL-7) magnetometer. Element concentrations were determined by an inductively coupled plasma emission (ICP, Optima 2000DV).

## Figures

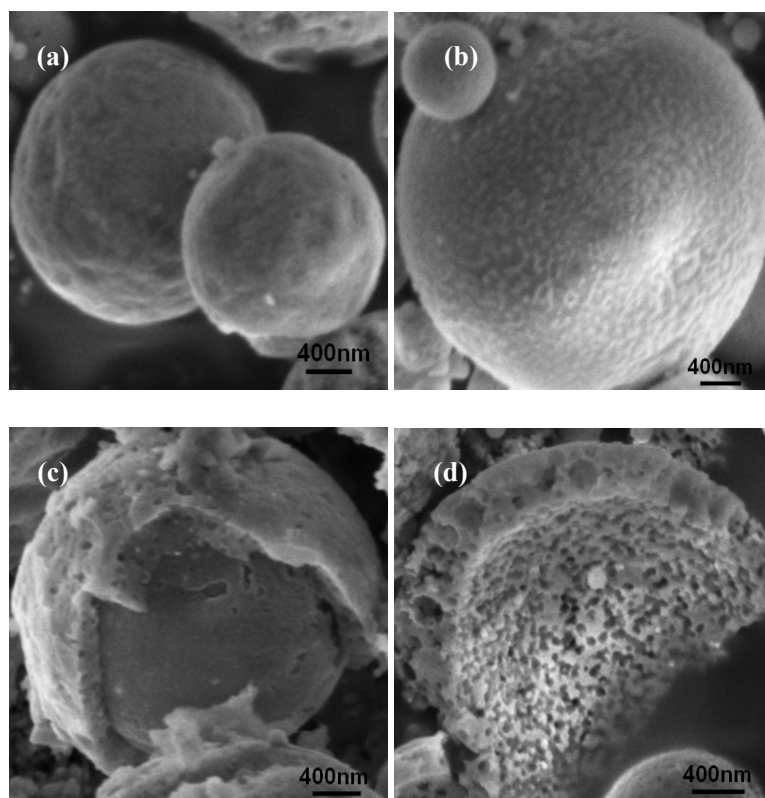

Figure S1 (a) (b) SEM images of  $\text{Fe}_3\text{O}_4@\text{C}-\text{SiO}_2$  core-shell aerosol particles, (c) (d) broken  $\text{C}-\text{C}@\text{Fe}_3\text{O}_4$  porous hollow particles

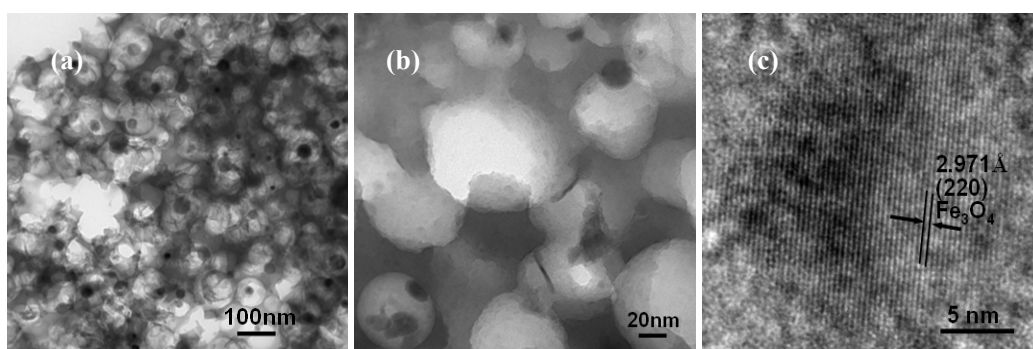

Figure S2 (a) (b) HRTEM images of C-C@Fe<sub>3</sub>O<sub>4</sub> porous hollow particles, (c) HRTEM image of the black spot in C-C@Fe<sub>3</sub>O<sub>4</sub> porous hollow particles

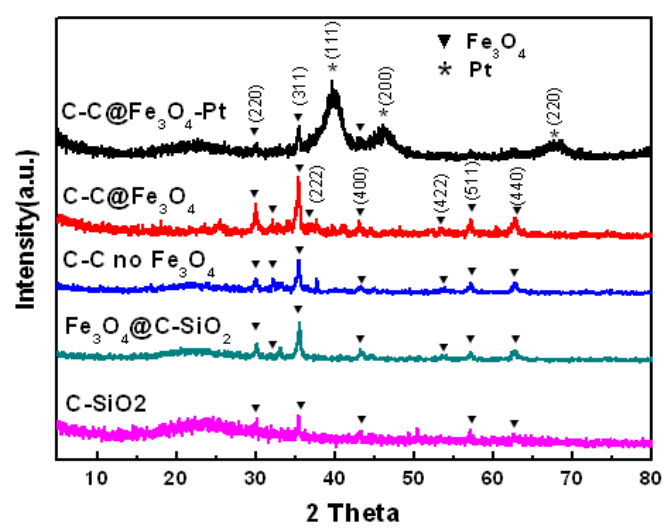

Figure S3 XRD patterns of different magnetic particles

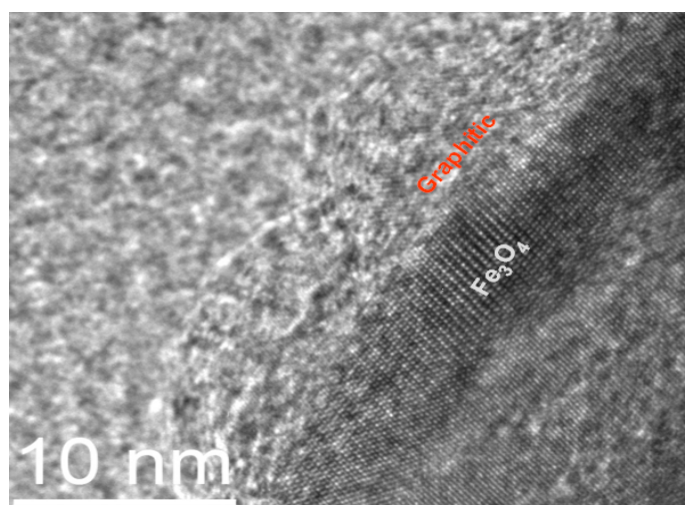

Figure S4 HRTEM image of the C-C@Fe<sub>3</sub>O<sub>4</sub> porous hollow particles



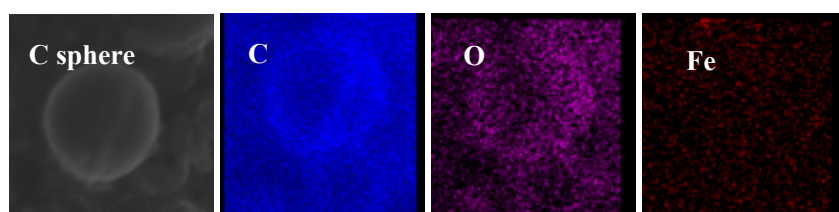

A. Element map of single carbon hollow spheres, which was obtained by etching the C-SiO<sub>2</sub> aerosol particles in HF solution, the iron species distribute homogeneously in the carbon shell

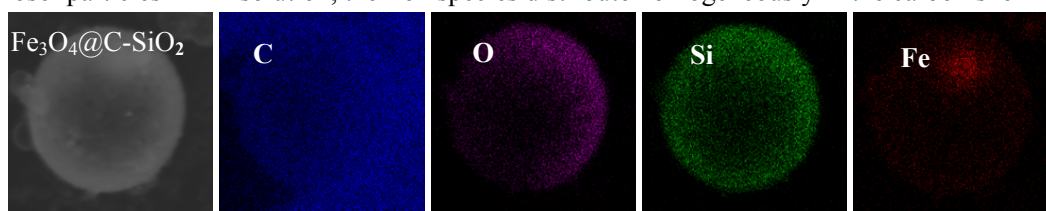

B. Element map of the Fe<sub>3</sub>O<sub>4</sub>@C-SiO<sub>2</sub> core-shell aerosol particles, the bright red spots can be ascribed to the encapsulated Fe<sub>3</sub>O<sub>4</sub> nanoparticles

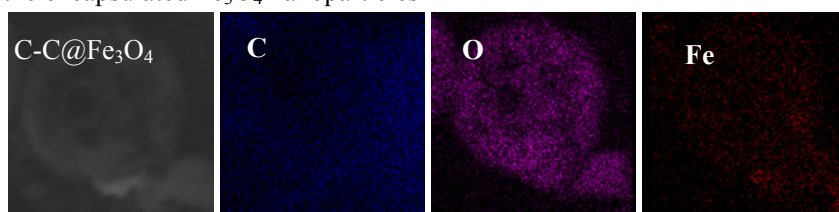

C. Element map of the C-C@Fe<sub>3</sub>O<sub>4</sub> porous hollow particles

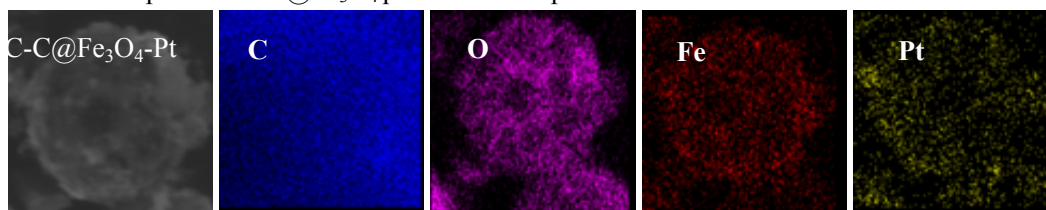

D. Element map of the C-C@Fe<sub>3</sub>O<sub>4</sub>-Pt porous hollow particles

Figure S5 Distribution of iron species in different hollow spheres

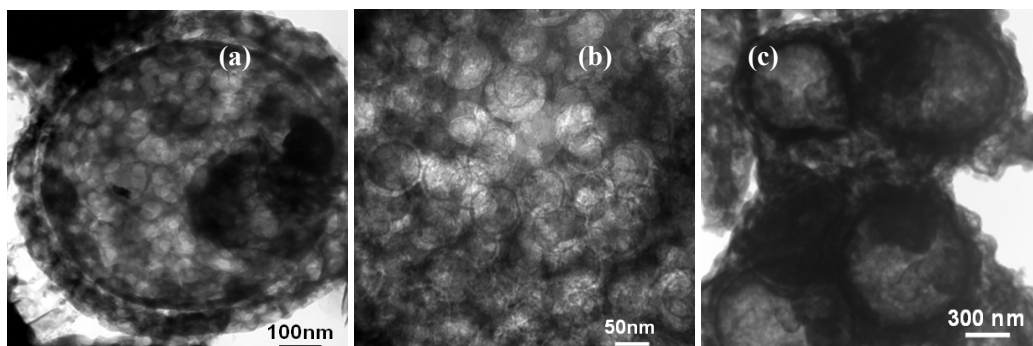

A. (a) (b) TEM images of C-C porous particles, no any  $\text{Fe}_3\text{O}_4$  was added in the aerosol precursor solution, (c) double-shelled hollow C-C particles without pores in the carbon layer with RF as the carbon source

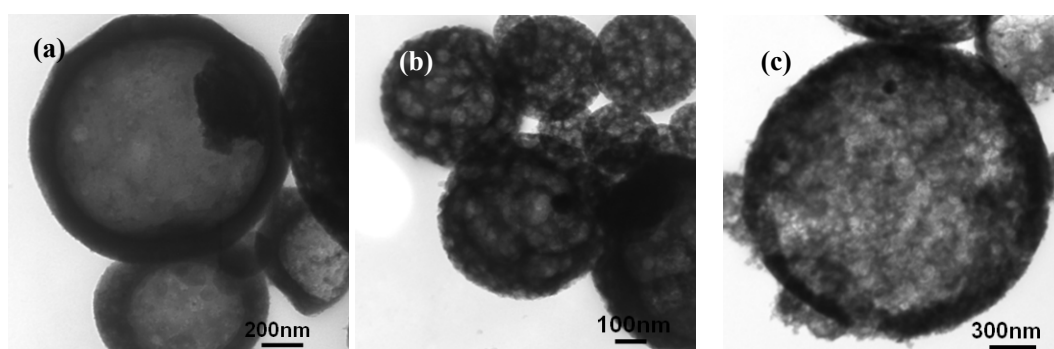

B.  $\text{Fe}_3\text{O}_4@\text{C-SiO}_2@\text{RF-COOH}$  core-shell particles, (a) without CTAB and (b) with CTAB, (c) C-C particles obtained from (a)

Figure S6 The controlled experiments show that only C-C porous particles are obtained when no  $\text{Fe}_3\text{O}_4$  is added in C-SiO<sub>2</sub> aerosol particles while other conditions keep constant, and C-C spheres without porous structure are prepared if RF-COOH is replaced with RF (Fig. S6 A). No obvious pores in  $\text{Fe}_3\text{O}_4@\text{C-SiO}_2@\text{RF-COOH}$  precursor particles and C-C spheres are formed without the presence of CTAB, revealing the important role of CTAB to template the pores (Fig. S6 B). These results reveal that both the CTAB and the  $\text{Fe}_3\text{O}_4$  cores play important roles in generation of mesoporous carbon microspheres containing dispersed  $\text{Fe}_3\text{O}_4$  nanoparticles

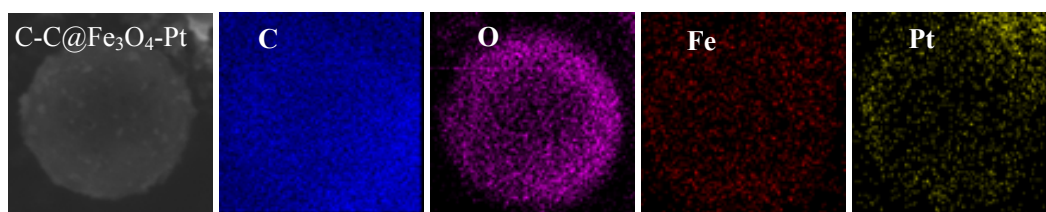

Figure S7. Element map of the C-C@Fe<sub>3</sub>O<sub>4</sub>-Pt porous hollow particles after five cycle usage

#### References

- 1 H. Zhang, X. Li, G. He, J. Zhan and D. Liu, *Ind. Eng. Chem. Res.*, 2013, **52**, 16902.
- 2 Y. Wang, B. Sunkara, J. Zhan, J. He, L. Miao, G. L. McPherson, V. T. John and L. Spinu, *Langmuir*, 2012, **28**, 13783.
